# Supplementary material for: FQStat: a parallel architecture for very high-speed assessment of sequencing quality metrics
Source: PubMed Central journal article supplement (PMC6694608; doi:10.1186/s12859-019-3015-y), 2019-08-15

# Supplementary File 4

## Performance gain per assigned core

Read Length = 75 bp

### DATA RANGE

File size (number of reads):  $10^6$ ,  $2 \times 10^6$ ,  $3 \times 10^6$ ,  $4 \times 10^6$ ,  $5 \times 10^6$ ,  $10^7$ ,  $1.5 \times 10^7$ ,  $2 \times 10^7$ ,  $3 \times 10^7$ ,  $5 \times 10^7$ ,  $10^8$

Segment size (number of reads):  $10^5$ ,  $2 \times 10^5$ ,  $5 \times 10^5$ ,  $10^6$ ,  $2 \times 10^6$ ,  $5 \times 10^6$ ,  $10^7$ ,  $3 \times 10^7$ ,  $5 \times 10^7$ ,  $10^8$

Number of cores: 10, 16, 20, 30, 40, 50, 60, 70, 80, 90, 100, 120, 140

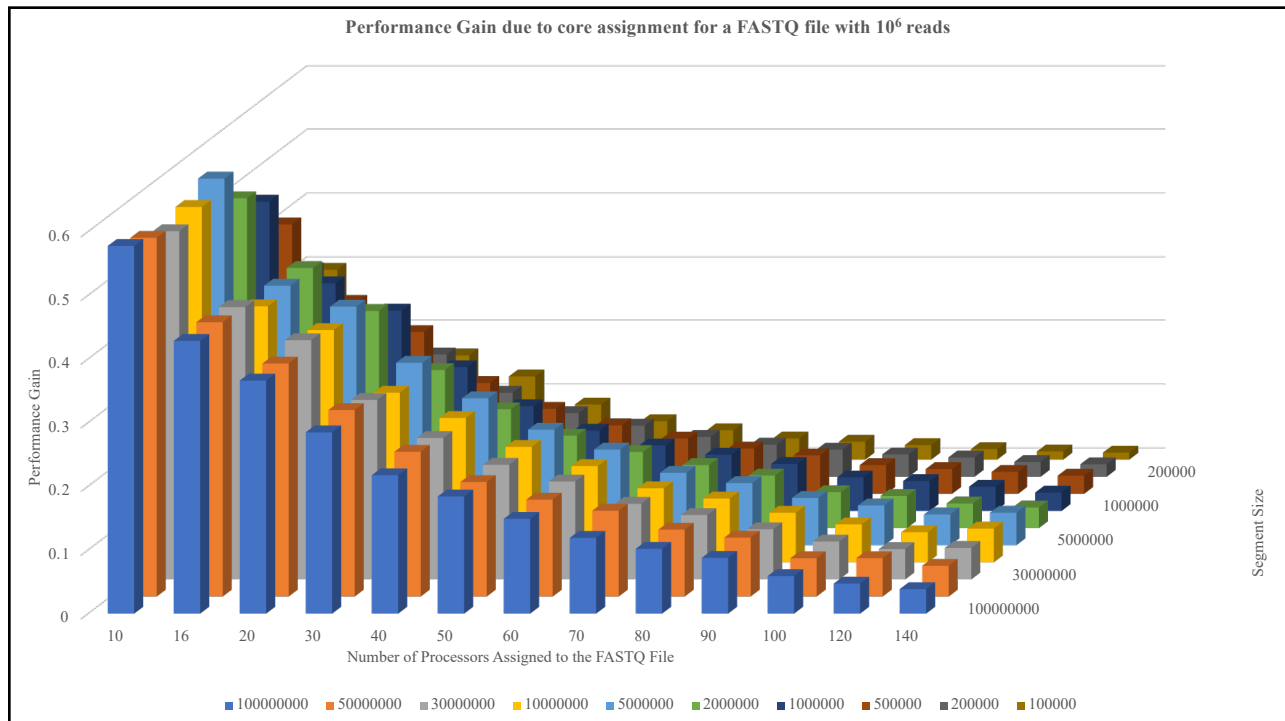

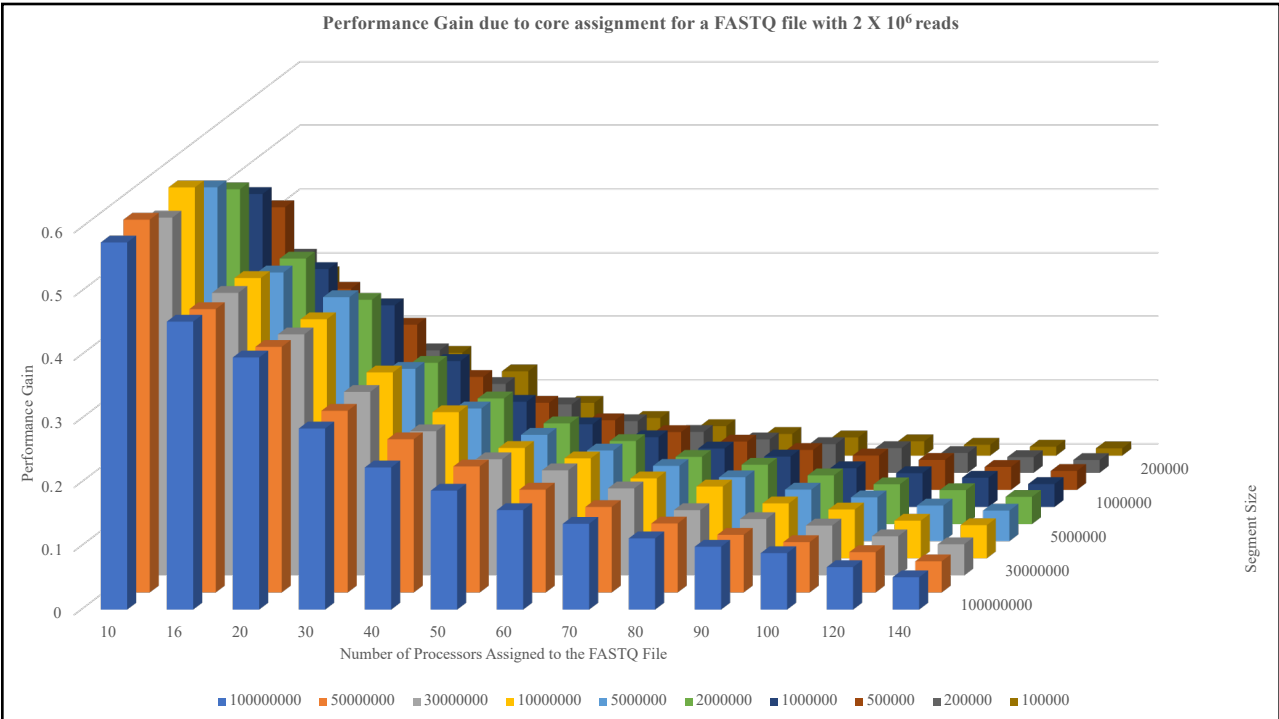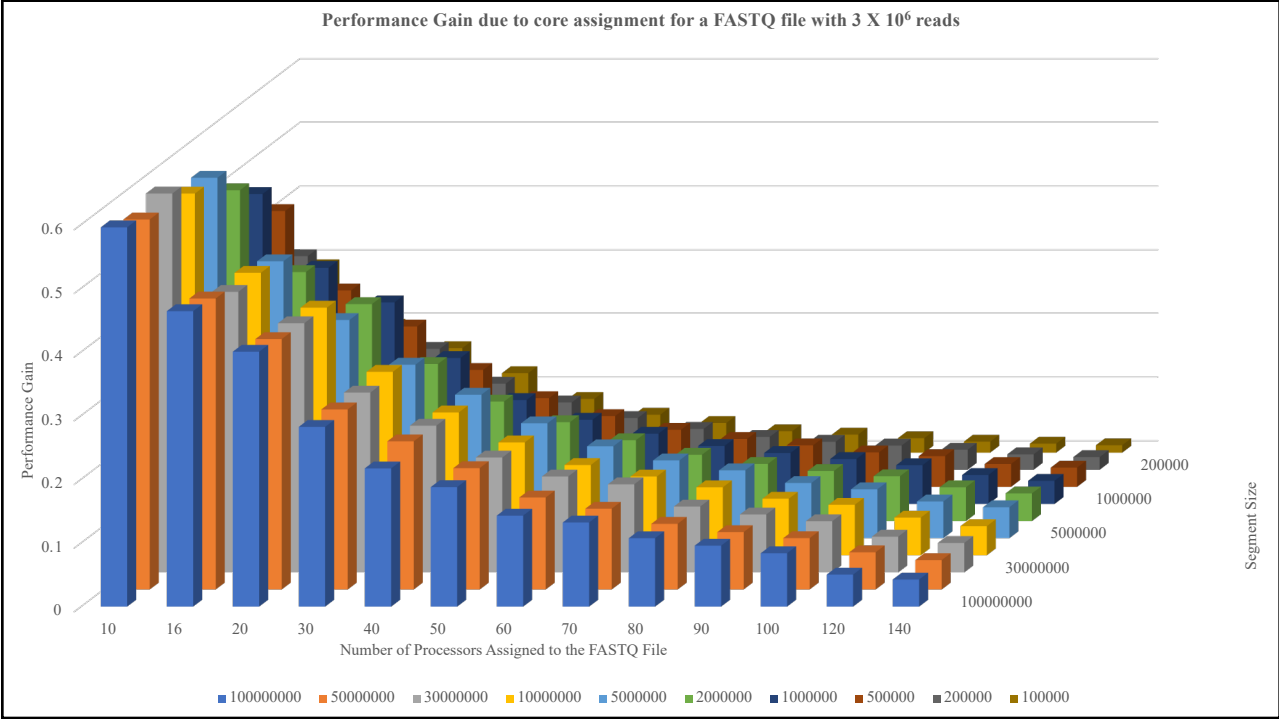

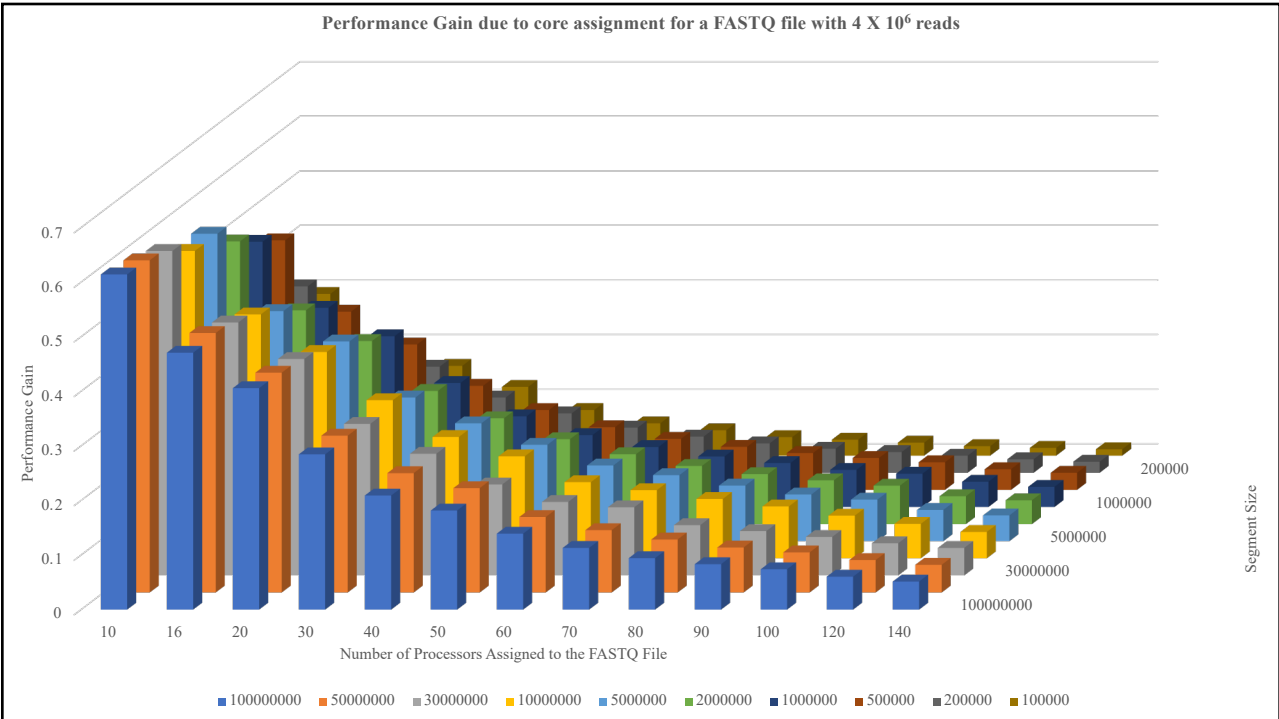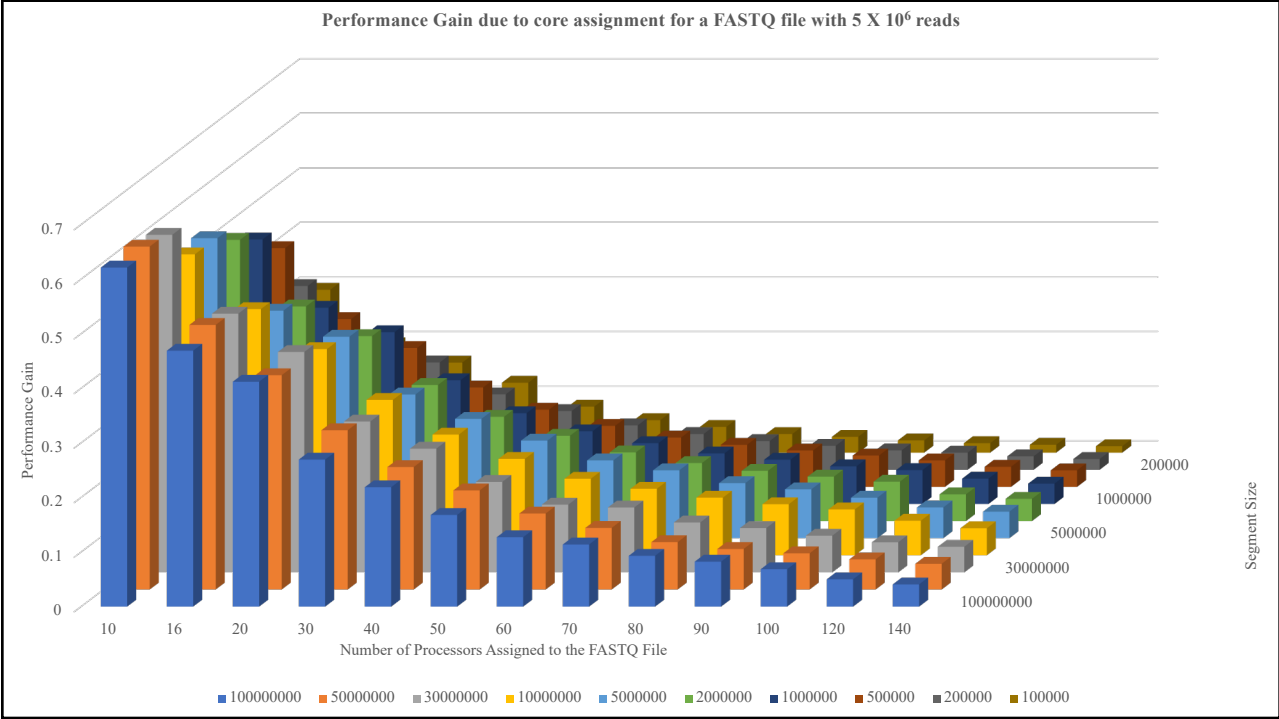

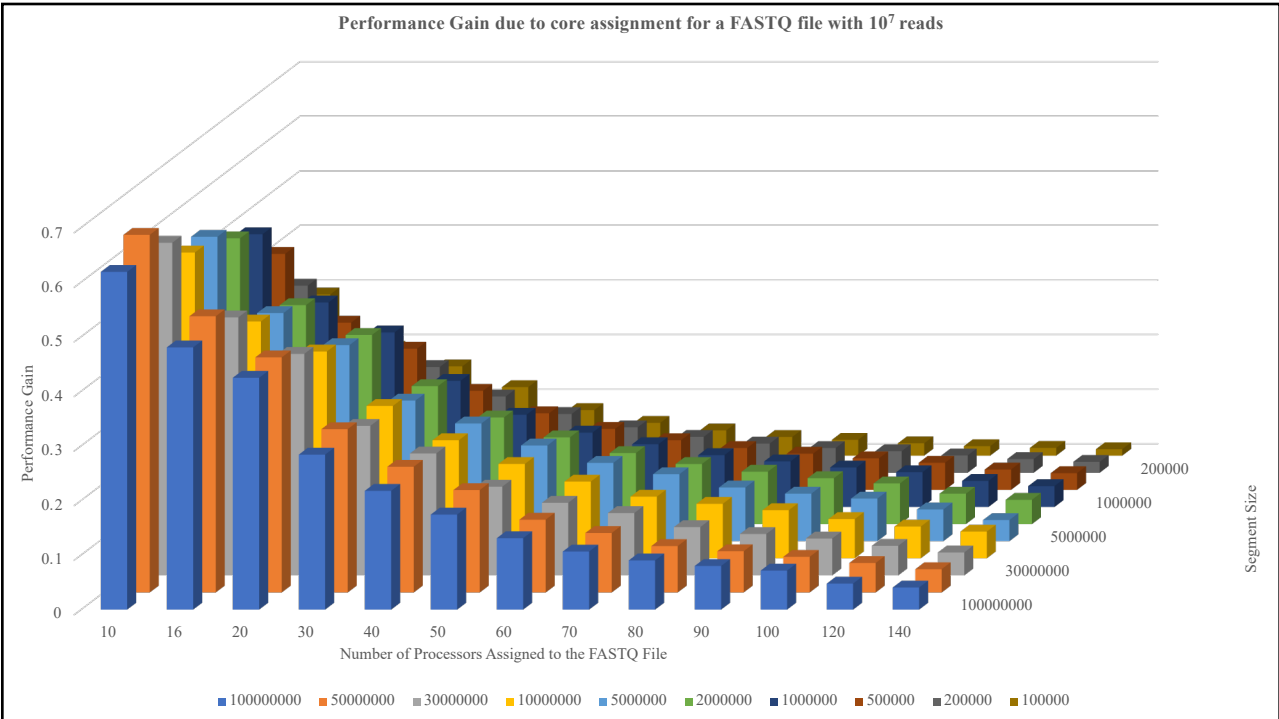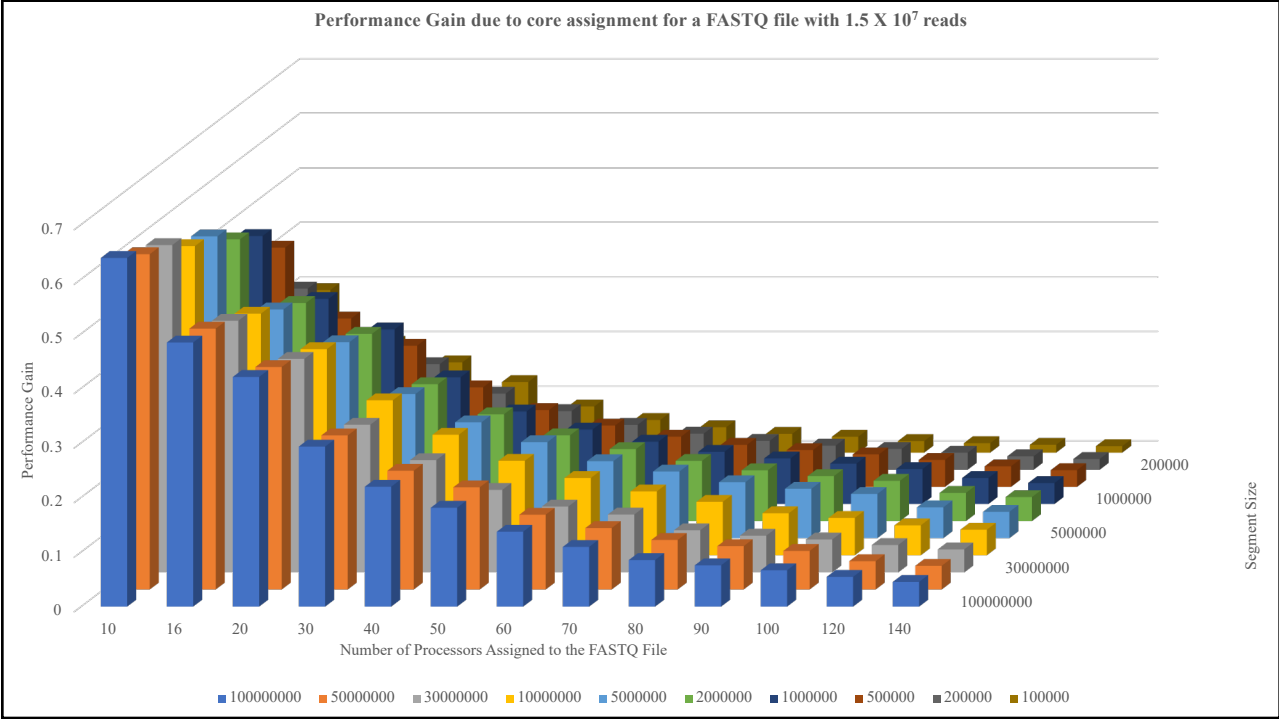

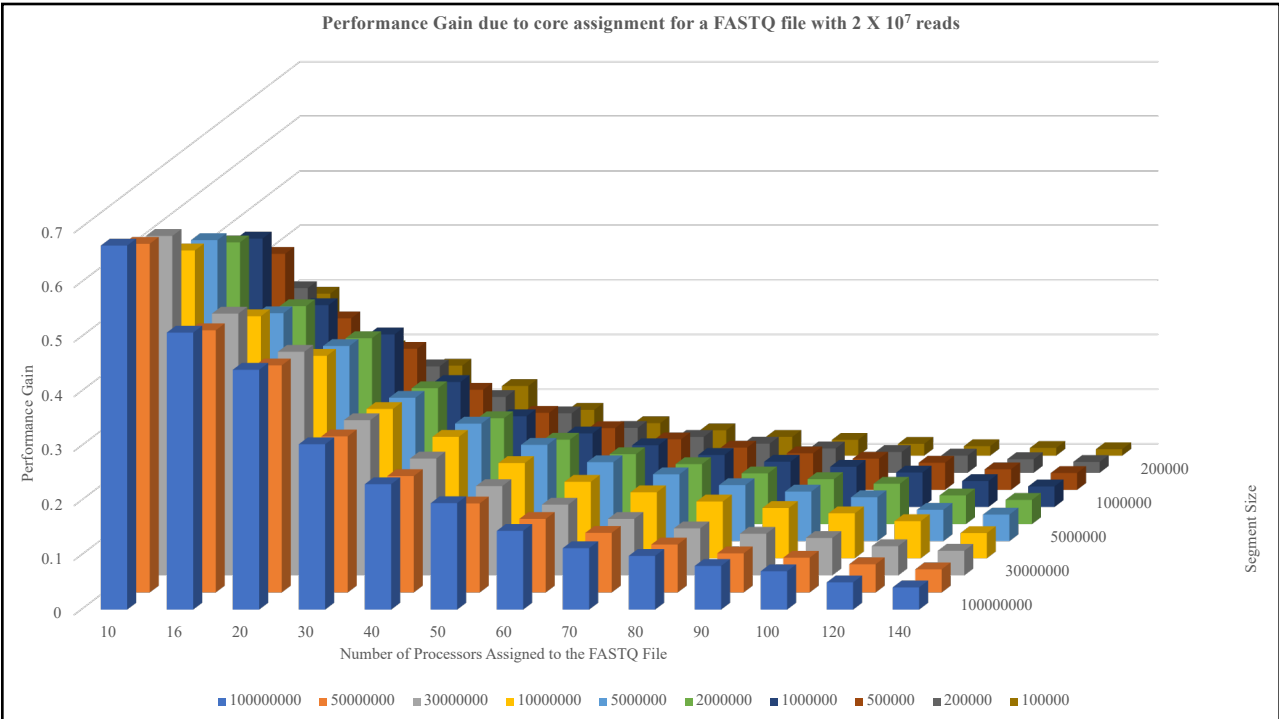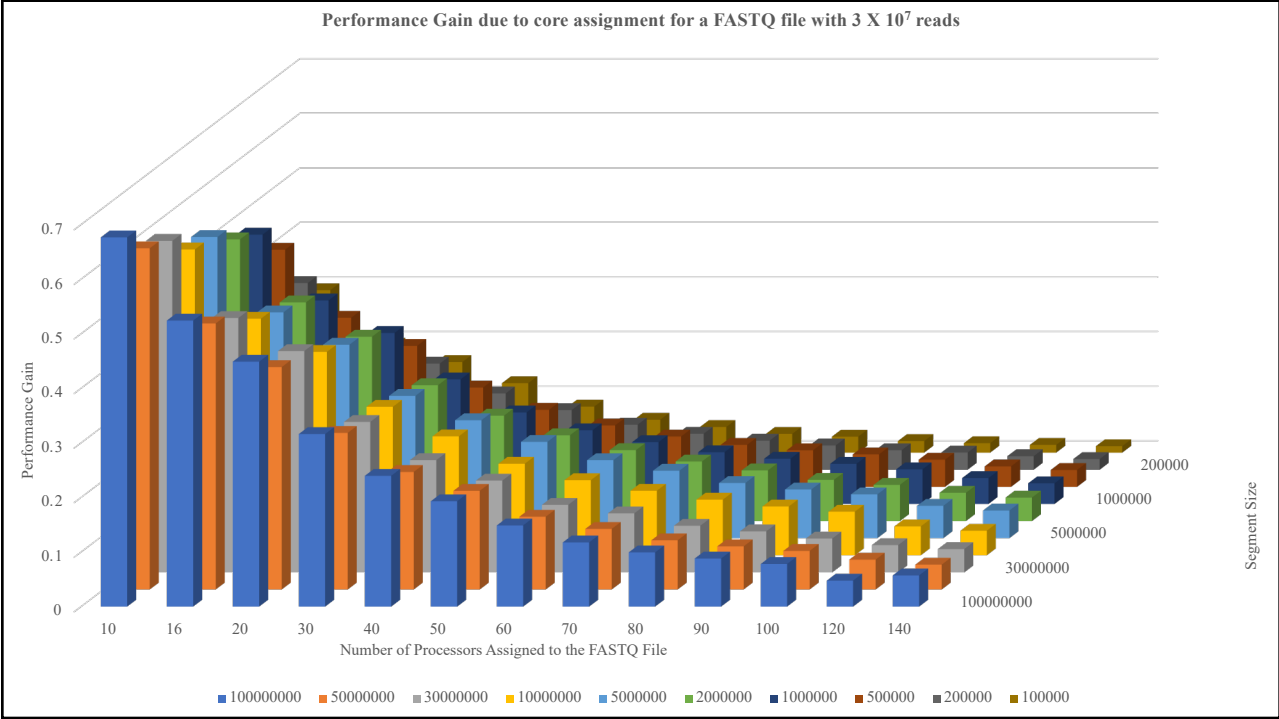

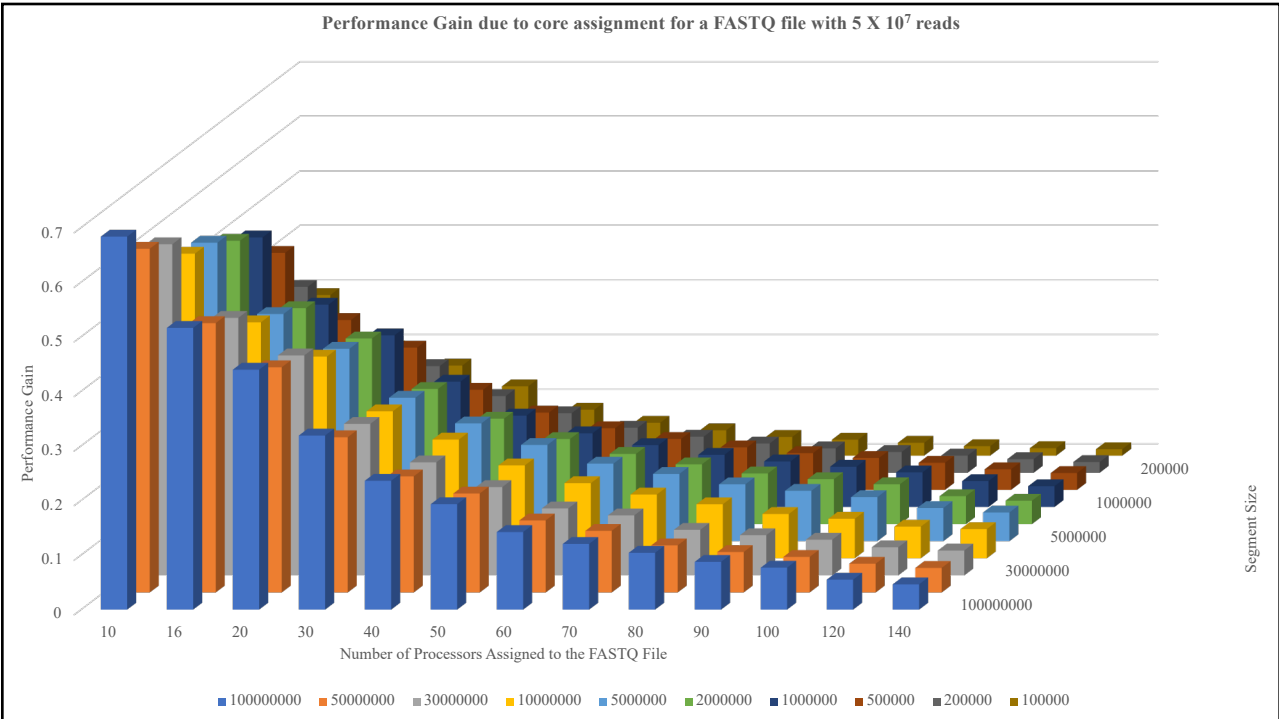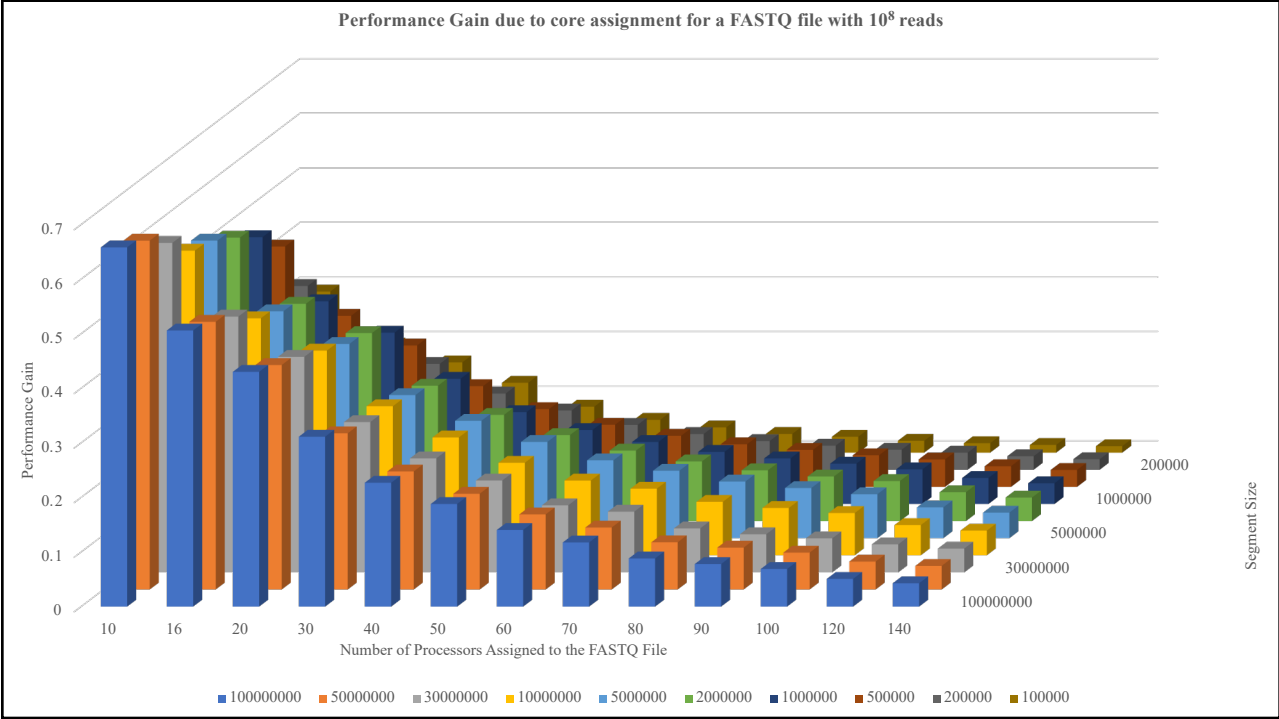

Supplement: 12859_2019_3015_MOESM4_ESM.pdf [file 12859_2019_3015_MOESM4_ESM.pdf]
